# Supplementary material for: Localization-Specific Expression of CCR1 and CCR5 by Mast Cell Progenitors
Source: PubMed Central journal article supplement (PMC7054384; doi:10.3389/fimmu.2020.00321), 2020-02-26
Supplement: Image_1.pdf [file Image_1.pdf]

*Supplementary Figure 1*

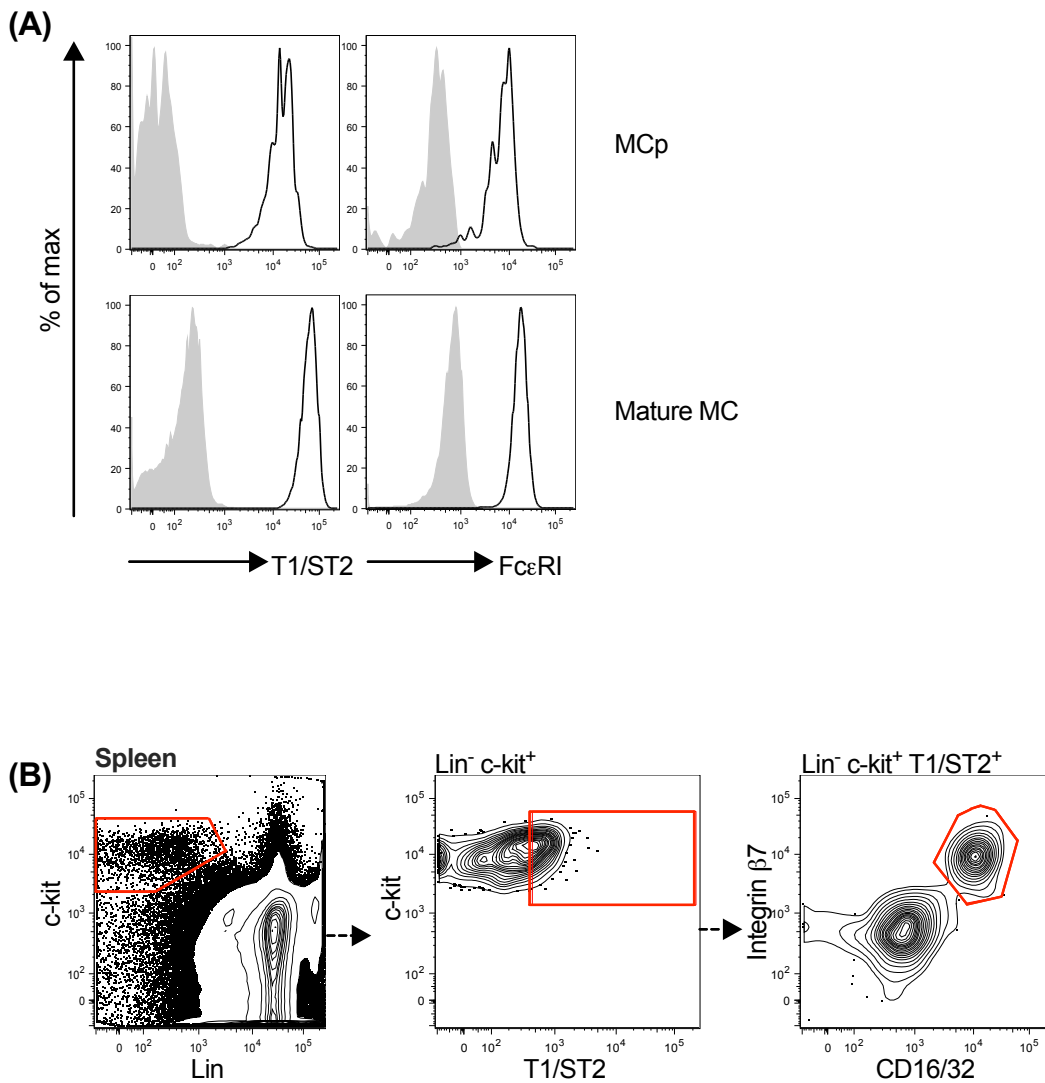

**Supplemental Figure 1.** Peritoneal mast cells and their progenitors express T1/ST2 and FcεRI. **(A)** Peritoneal cells from naïve BALB/c mice were stained by fluorescently-labelled antibodies and analyzed by flow cytometry. MCp were identified as Lin<sup>-</sup> c-kit<sup>+</sup> SSC<sup>lo</sup> integrin β7<sup>hi</sup> CD16/32<sup>int</sup> cells and mast cells as Lin<sup>-</sup> c-kit<sup>+</sup> SSC<sup>hi</sup> integrin β7<sup>int</sup> CD16/32<sup>hi</sup> cells. Representative histograms demonstrate the surface expression of T1/ST2 and FcεRI by the respective cell population. Pooled cells from 3-6 mice were used in each individual experiment (n=2). **(B)** Spleen cells from naive mice were stained with fluorescently-conjugated antibodies and analyzed by flow cytometry. Representative gating strategy for MCp identified as Lin<sup>-</sup> c-kit<sup>+</sup> T1/ST2<sup>+</sup> integrin β7<sup>hi</sup> CD16/32<sup>+</sup> cells.
